# Supplementary material for: B‐factor Guided Proline Substitutions in Chromobacterium violaceum Amine Transaminase: Evaluation of the Proline Rule as a Method for Enzyme Stabilization
Source: PubMed Central journal article supplement — Chembiochem. 2019 Mar 19;20(10):1297–304. doi: 10.1002/cbic.201800749 (PMC6593452; doi:10.1002/cbic.201800749), 2019-03-19
Supplement: CBIC-20-1297-s001.pdf [file CBIC-20-1297-s001.pdf]

# CHEMBIOCHEM

## Supporting Information

### ***B*-factor Guided Proline Substitutions in *Chromobacterium violaceum* Amine Transaminase: Evaluation of the Proline Rule as a Method for Enzyme Stabilization**

Henrik Land<sup>+, [a, b]</sup> Jonatan C. Campillo-Brocal<sup>+, [a]</sup> Maria Svedendahl Humble,<sup>\*[c]</sup> and Per Berglund<sup>\*[a]</sup>

cbic\_201800749\_sm\_miscellaneous\_information.pdf

## **Author Contributions**

*H.L. Methodology: Equal; Writing – original draft: Equal; Writing – review & editing: Equal*

*J.C. Methodology: Equal; Writing – original draft: Equal; Writing – review & editing: Equal.*

# Supporting information

## Table of Contents

|                        |           |
|------------------------|-----------|
| <b>Table S1</b> .....  | <b>S1</b> |
| <b>Figure S1</b> ..... | <b>S2</b> |
| <b>Figure S2</b> ..... | <b>S3</b> |
| <b>Figure S3</b> ..... | <b>S4</b> |
| <b>Table S2</b> .....  | <b>S5</b> |
| <b>Figure S4</b> ..... | <b>S6</b> |
| <b>Figure S5</b> ..... | <b>S7</b> |
| <b>Figure S6</b> ..... | <b>S8</b> |

**Table S1.** All  $\alpha$ -helices and  $\beta$ -turns of Cv-ATA and the residues that belong to them.

| Residues <sup>[a]</sup> | Secondary structure element | Residues (Cont.) | Secondary structure element (Cont.) |
|-------------------------|-----------------------------|------------------|-------------------------------------|
| 6-16                    | $\alpha$ -Helix 1           | 240-252          | $\alpha$ -Helix 9                   |
| 24-31                   | $\alpha$ -Helix 2           | 266-269          | $\beta$ -Turn 11                    |
| 40-43                   | $\beta$ -Turn 1             | 273-278          | $\alpha$ -Helix 10                  |
| 46-49                   | $\beta$ -Turn 2             | 287-290          | $\beta$ -Turn 12                    |
| 62-65                   | $\beta$ -Turn 3             | 289-292          | $\beta$ -Turn 13                    |
| 68-80                   | $\alpha$ -Helix 3           | 291-294          | $\beta$ -Turn 14                    |
| 93-103                  | $\alpha$ -Helix 4           | 303-313          | $\alpha$ -Helix 11                  |
| 108-111                 | $\beta$ -Turn 4             | 320-323          | $\beta$ -Turn 15                    |
| 119-138                 | $\alpha$ -Helix 5           | 325-342          | $\alpha$ -Helix 12                  |
| 140-143                 | $\beta$ -Turn 5             | 346-350          | $\alpha$ -Helix 13                  |
| 149-152                 | $\beta$ -Turn 6             | 352-363          | $\alpha$ -Helix 14                  |
| 158-163                 | $\alpha$ -Helix 6           | 367-370          | $\beta$ -Turn 16                    |
| 166-171                 | $\alpha$ -Helix 7           | 376-379          | $\beta$ -Turn 17                    |
| 187-190                 | $\beta$ -Turn 7             | 388-391          | $\beta$ -Turn 18                    |
| 192-195                 | $\beta$ -Turn 8             | 398-410          | $\alpha$ -Helix 15                  |
| 196-216                 | $\alpha$ -Helix 8           | 418-421          | $\beta$ -Turn 19                    |
| 217-220                 | $\beta$ -Turn 9             | 431-457          | $\alpha$ -Helix 16                  |
| 230-233                 | $\beta$ -Turn 10            |                  |                                     |

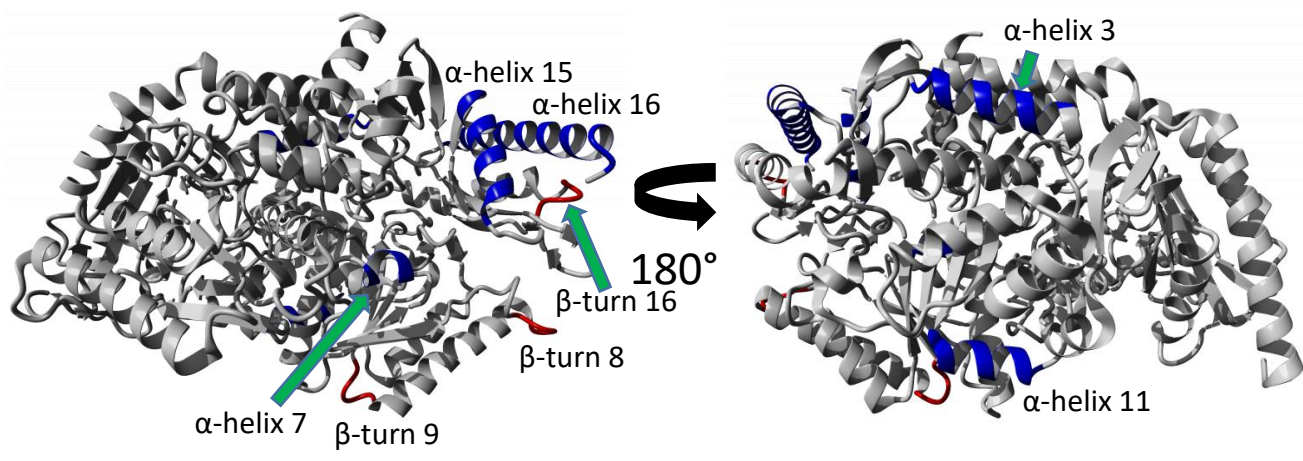

**Figure S1.** X-Ray crystal structure of Cv-ATA (PDB ID: 4A6T). Secondary structure elements selected for proline substitutions are highlighted by color. Blue:  $\alpha$ -helix. Red:  $\beta$ -turn.

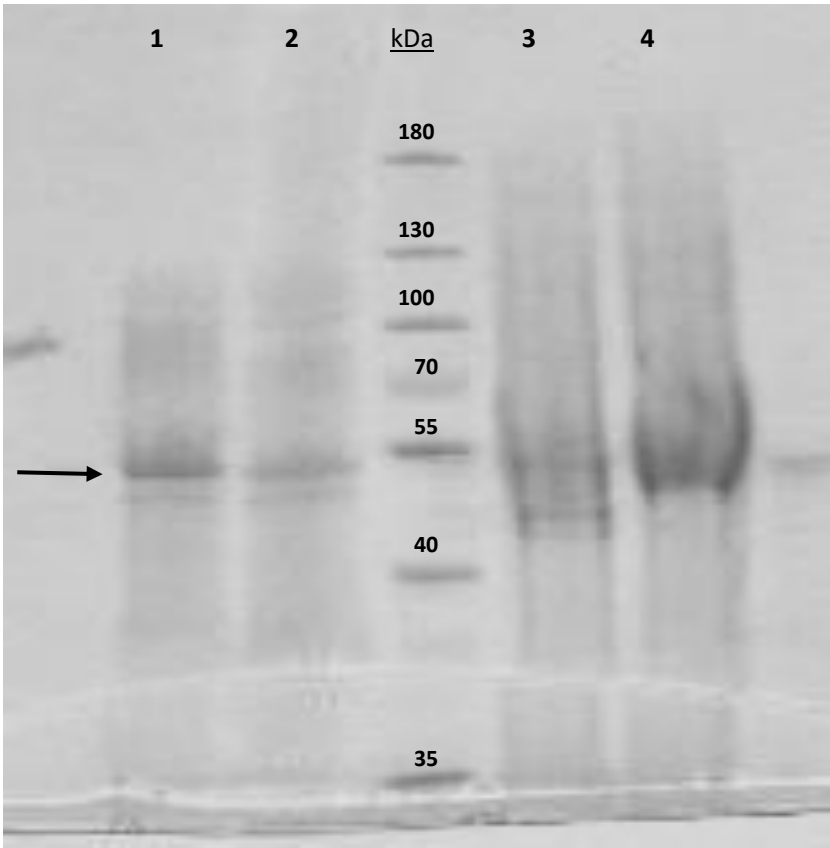

**Figure S2.** SDS-PAGE gel of Cv-ATA WT soluble fraction (1) and insoluble fraction (3) as well as Pro8 soluble fraction (2) and insoluble fraction (4).

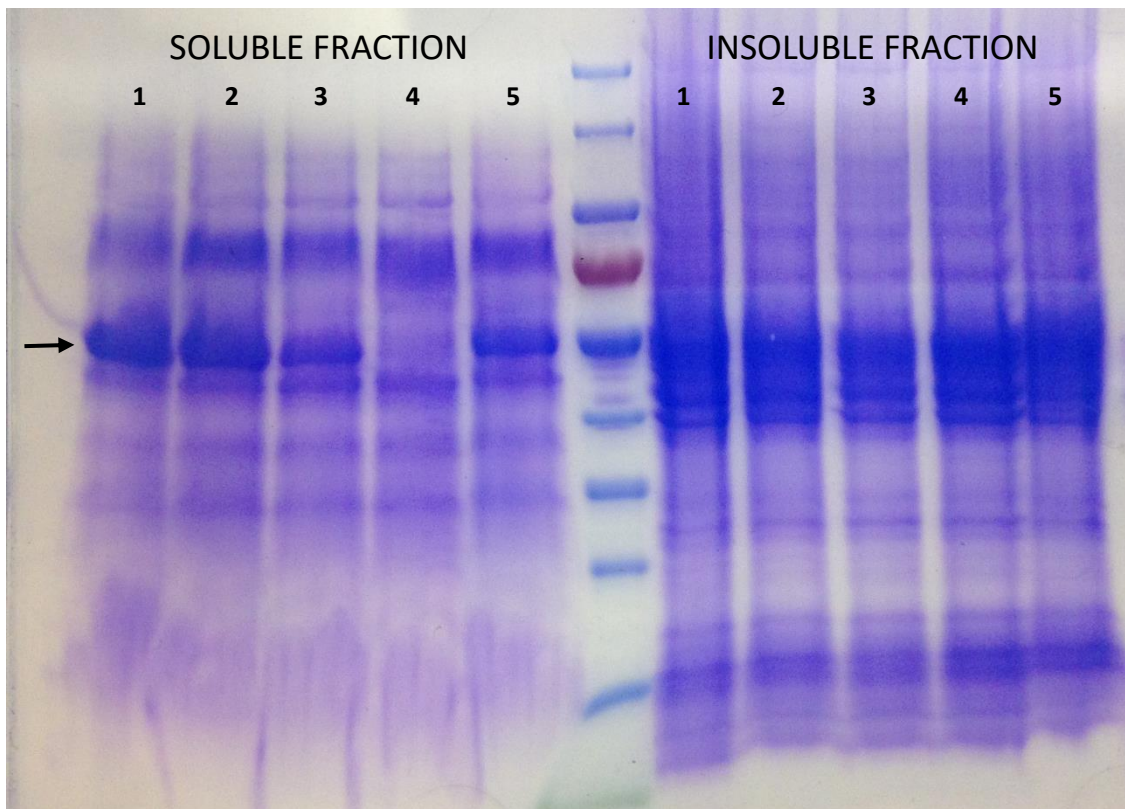

**Figure S3.** SDS-PAGE gel image of soluble and insoluble fractions of Cν-ATA WT (1), K69P/K304P (2), K167P/E368P (3), K193P/G398P (4) and D218P/R432P (5).

**Table S2.** Conservation of amino acid positions chosen for proline substitutions based on alignment with 500 most similar sequences in the IMG database.

| Residue | Conservation in 500 most similar proteins <sup>[a]</sup> |
|---------|----------------------------------------------------------|
| K69     | 37% (K 37%)                                              |
| K167    | 38% (G 49%)                                              |
| K193    | 8% (G37%)                                                |
| D218    | 12% (E 79%)                                              |
| K304    | 3% (D 67%)                                               |
| E368    | 6% (P 90%)                                               |
| G398    | 97% (G 97%)                                              |
| R432    | 37% (R 37%)                                              |

[a] Residue in parenthesis is most conserved residue in that position.



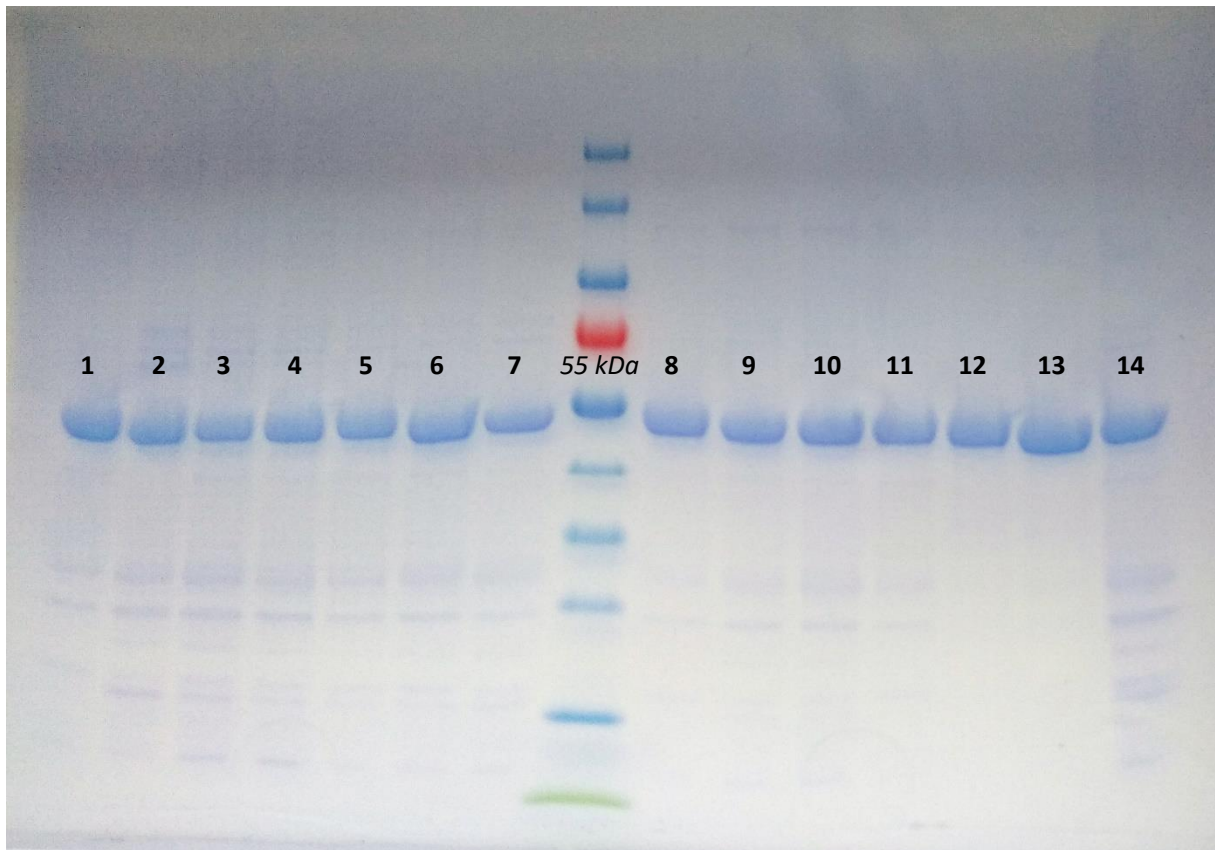

**Figure S4.** SDS-PAGE gel image of purified (5  $\mu$ g) Cv-ATA WT and mutants. (1): WT, (2): Pro7, (3): Pro5, (4): Pro4, (5): K69P/K304P, (6): K167P/E368P, (7): D218P/R432P, (8): K69P, (9): K167P, (10): K193P, (11): D218P, (12): K304P, (13): E368P and (14): R432P.

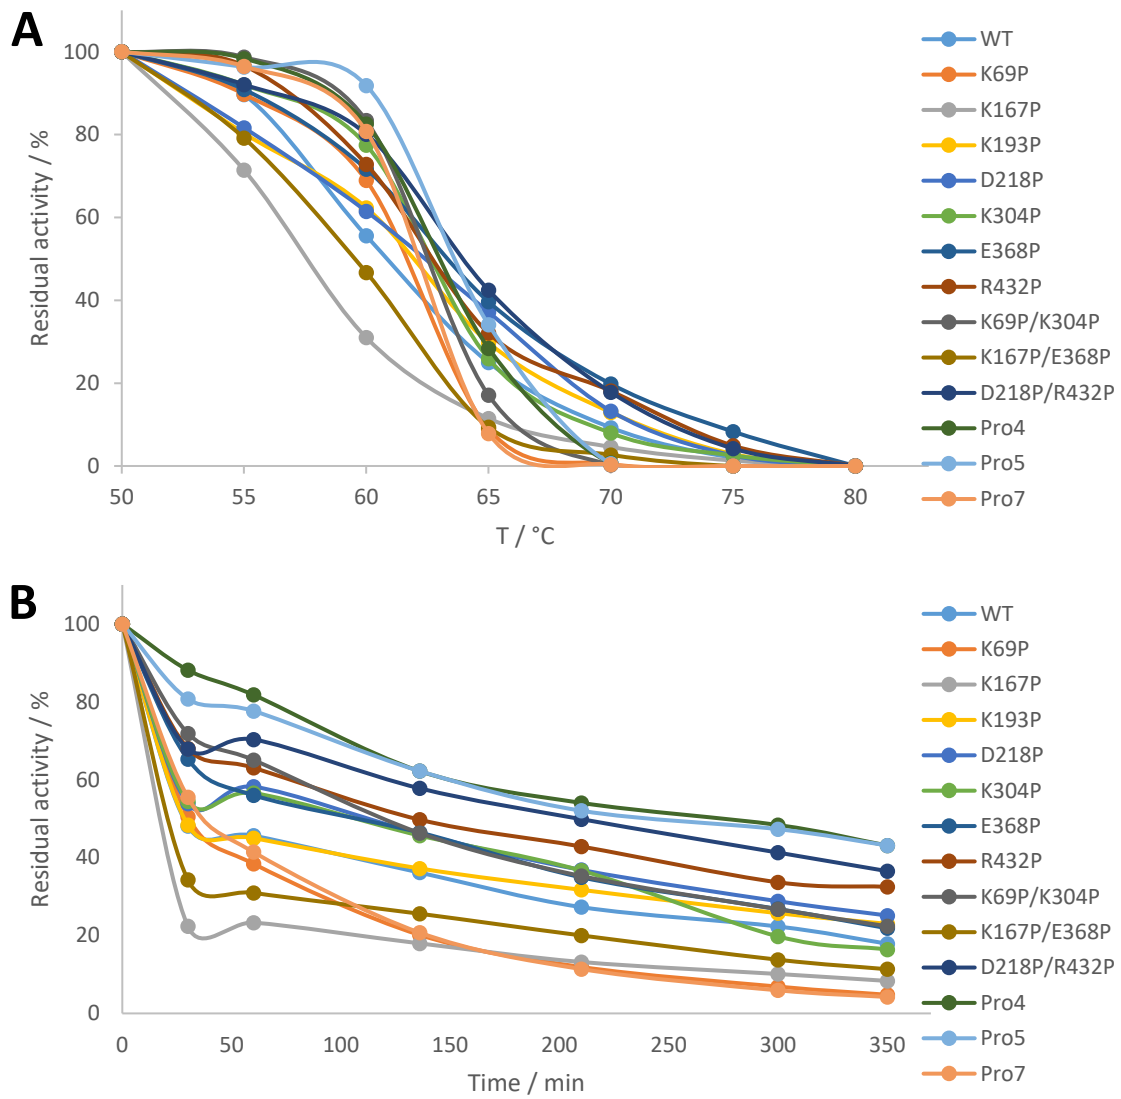

**Figure S5.** Experimental data that was used to calculate  $T_{50}$  (A) and  $t_{1/2}$  (B).

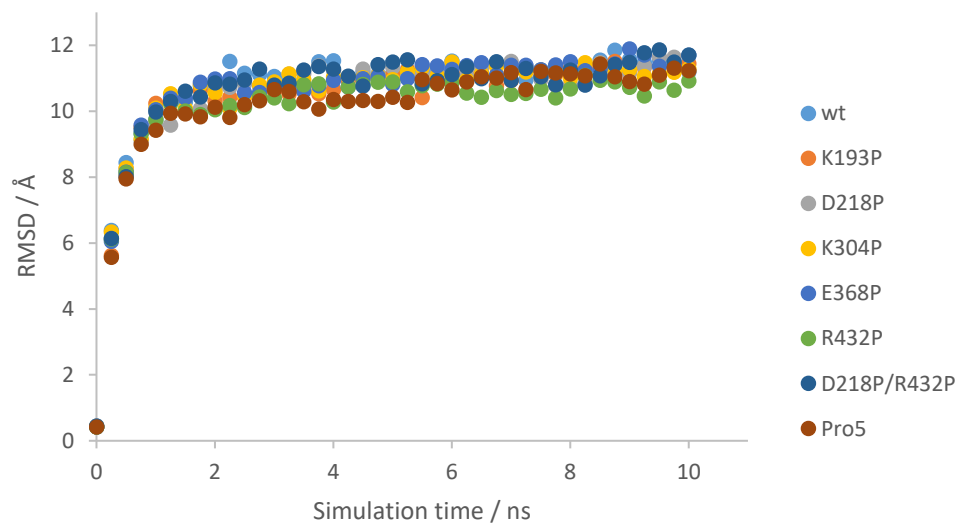

**Figure S6.** Total RMSD for all atoms over time for *Cv*-ATA WT and variants obtained from MD-simulations.
